# Supplementary material
Source: PubMed Central journal article supplement (PMC4959477)
Supplement: AEM.04016-15_zam999117059so1.pdf [file AEM.04016-15_zam999117059so1.pdf]

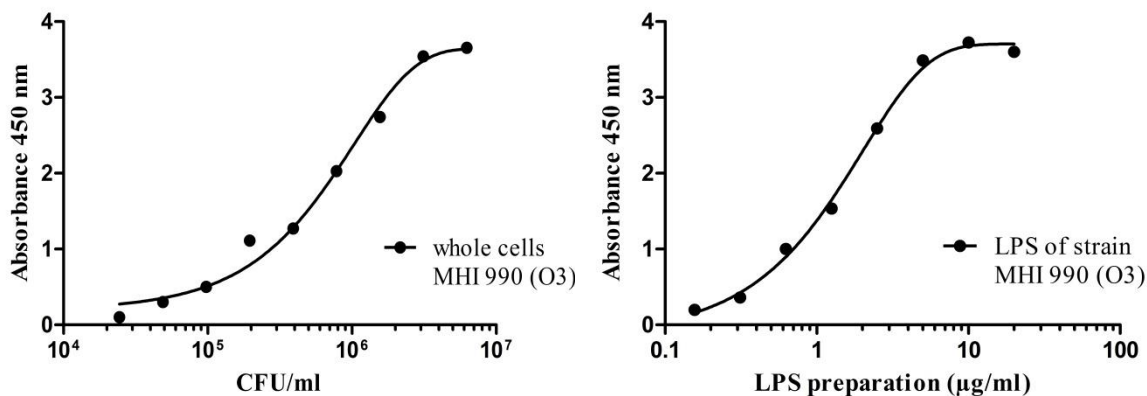

**Figure S1.** Reactivity of mAb 1A11 with whole cells and isolated LPS of strain MHI 990 (O3) in an indirect EIA. Both preparations were coated onto EIA plates in twofold serial dilution and subsequently probed with mAb 1A11 (2.5 µg/ml). Bound mAb was detected using secondary HRP-labeled polyclonal rabbit-anti mouse IgG (1:2000 in 1% caseinate/PBS).

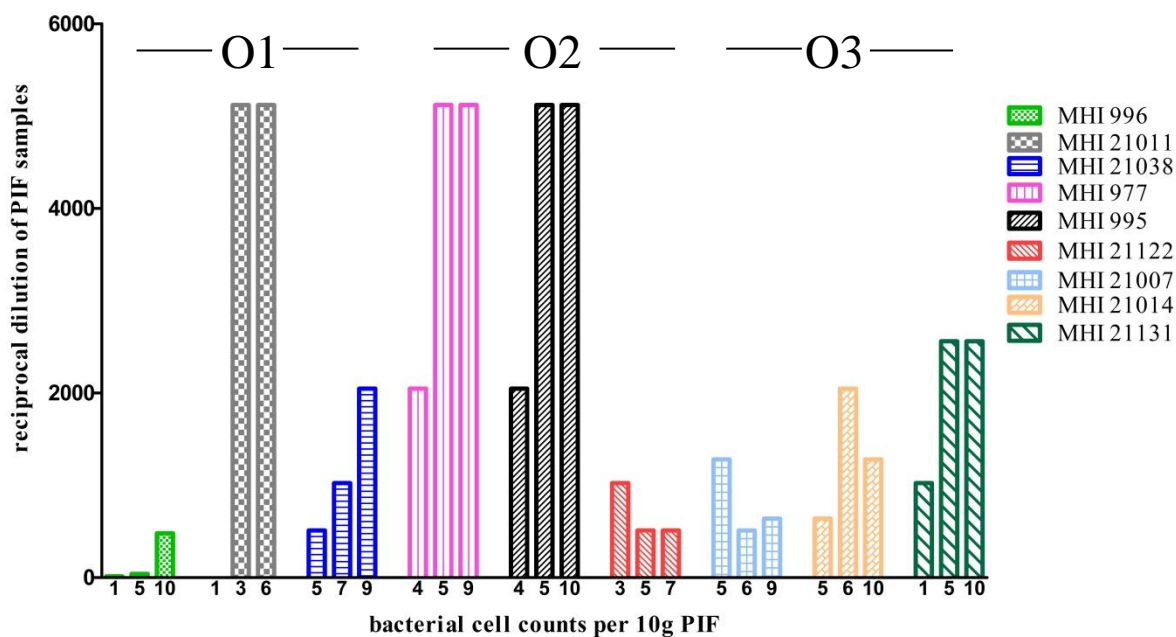

**Figure S2.** Analysis of enriched PIF samples, which were artificially contaminated with *C. sakazakii* serotypes O1, O2 and O3. For each serotype 3 strains were used to contaminate 10 g of PIF with bacterial cell counts ranging from 1 – 10. After 15 h of enrichment, serially diluted samples were directly analyzed in the sandwich EIAs. The reciprocal dilution at the detection limit of the samples ranged from 1:20 to 1:5,120. Experiments were conducted as triplicates as indicated by columns.

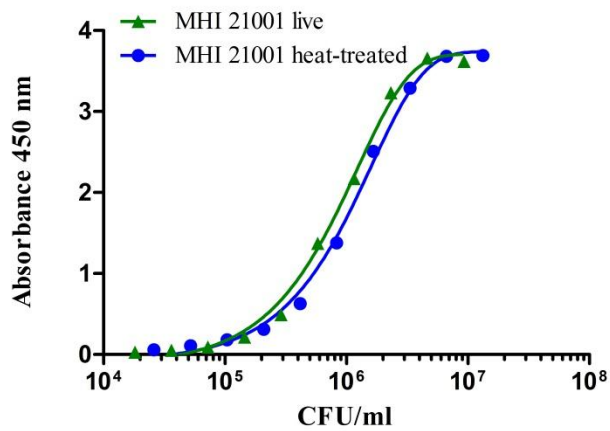

**Figure S3.** Evaluation of the established sandwich EIA for the detection of MHI 21001 (O1). Live and heat-treated (121°C, 15 min) bacterial cells were analyzed in tenfold serial dilutions using mAb 1C4 (10 µg/ml) as solid phase and 1C4-HRP (1:1000 in 1% caseinate/PBS) as detection antibody.
